# Supplementary material for: Glucosamine Enhancement of BDNF Expression and Animal Cognitive Function
Source: MDPI journal article supplement (doi:10.3390/molecules25163667), 2020-08-12
Supplement: s1 [file s1]

BDNF

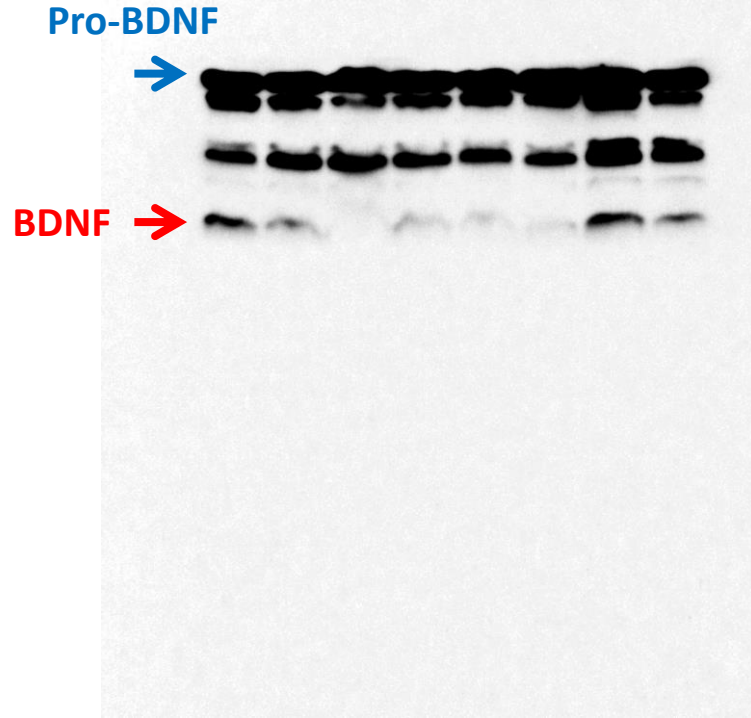

Pro-BDNF

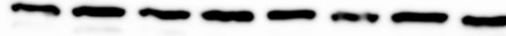

$\beta$ -actin

75 kDa  
63 kDa  
48 kDa

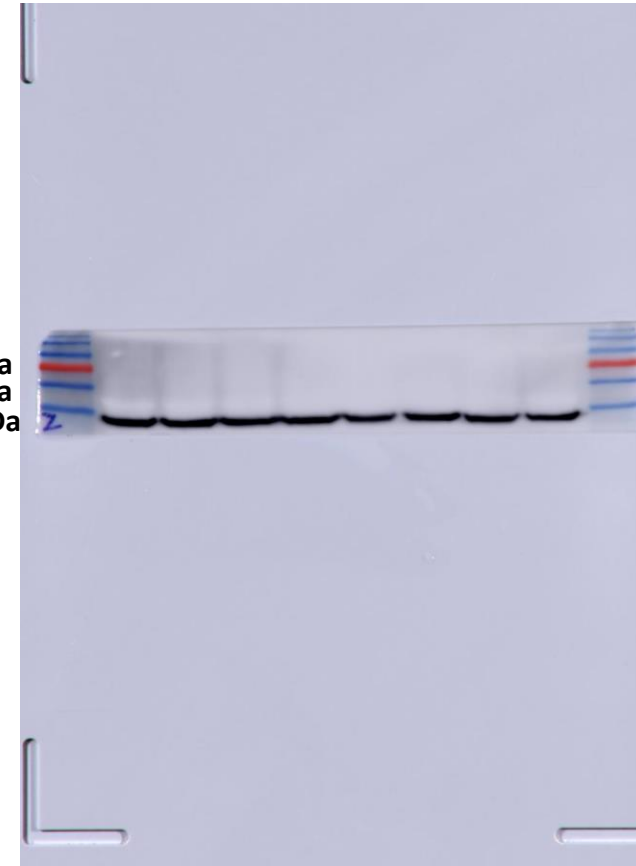

Marker: orange as 75 KDa; green as 28 kDa

Due to the longer exposure (luminescence) to obtain the BDNF/Pro-BDNF image, before updating the software (Amersham imager 680), the image obtained from machine can not be combined with the one from shorter exposure image showing marker (visible light). Therefore, there is no marker on the BDNF image.
