# Supplementary figures and images for: Glucosamine Enhancement of BDNF Expression and Animal Cognitive Function
Source: MDPI journal article supplement (doi:10.3390/molecules25163667), 2020-08-12

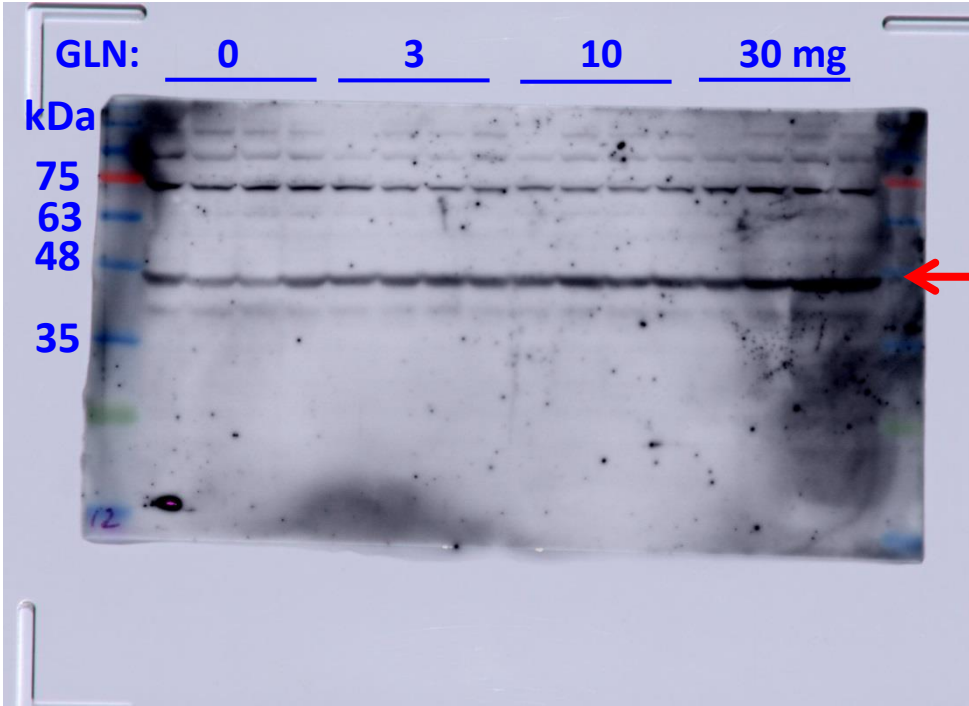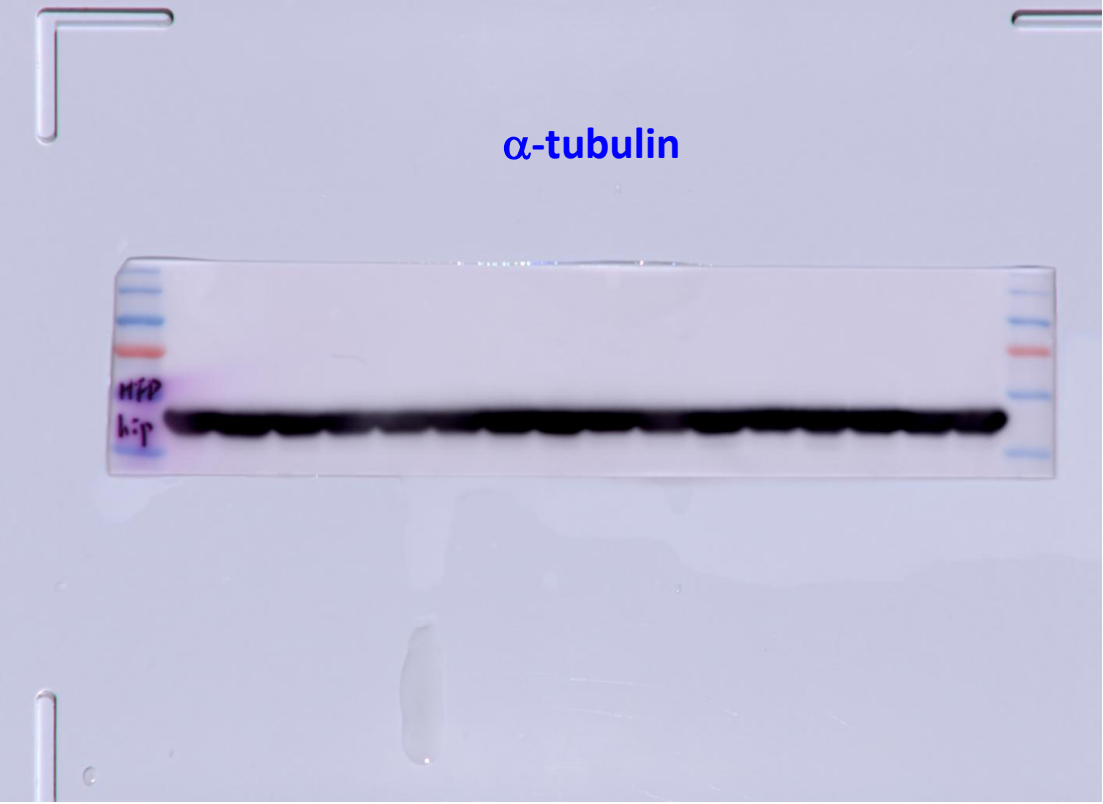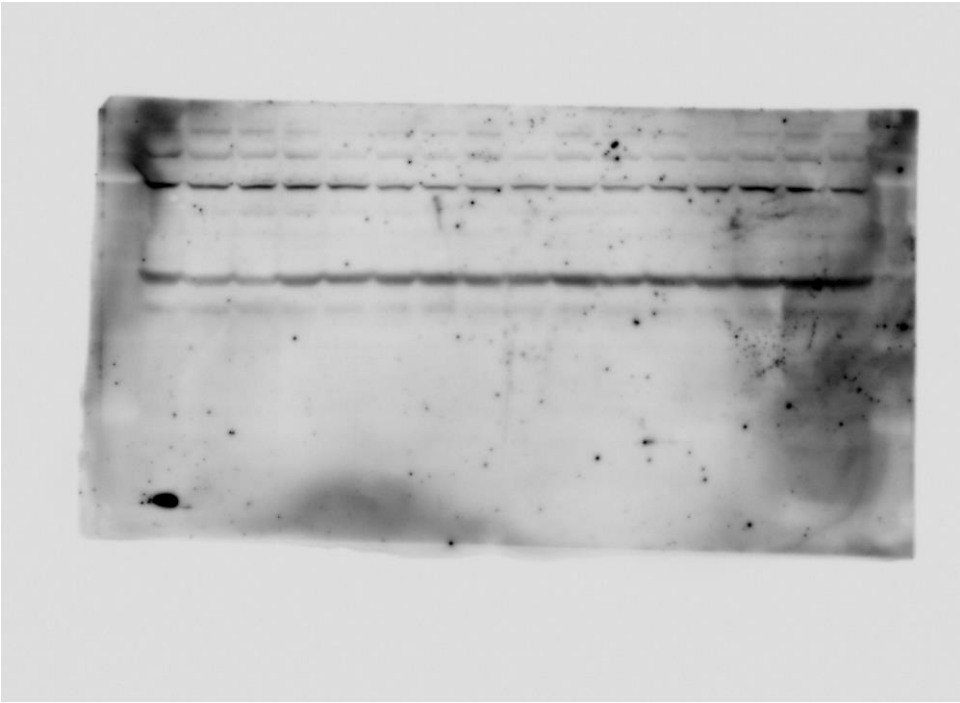

Supplement: s1 [file s1]

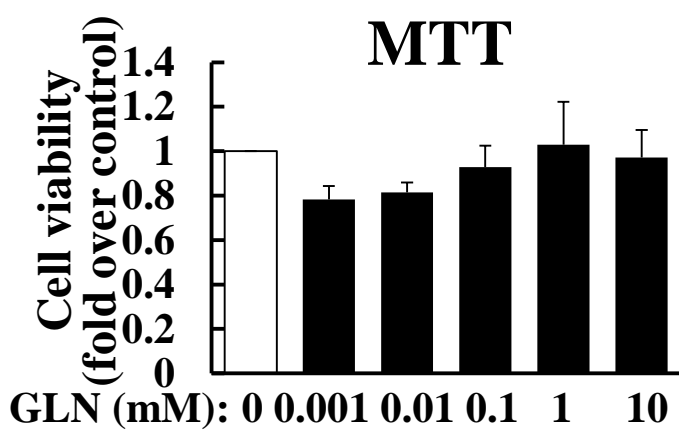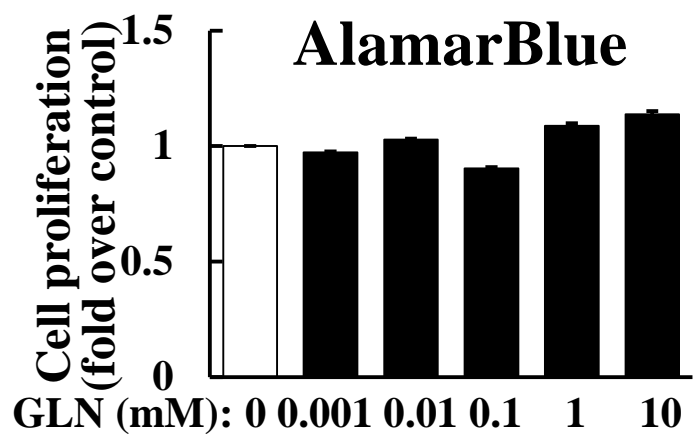

Supplement: s1 [file s1]

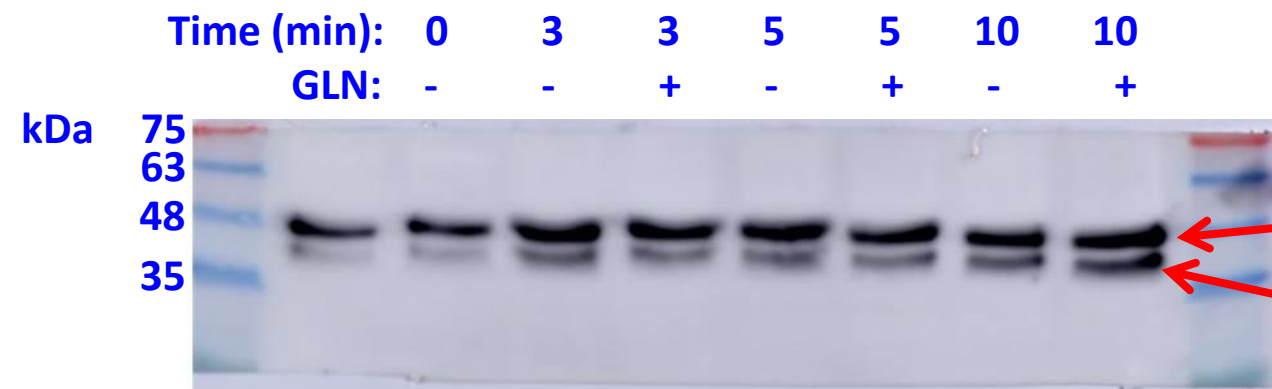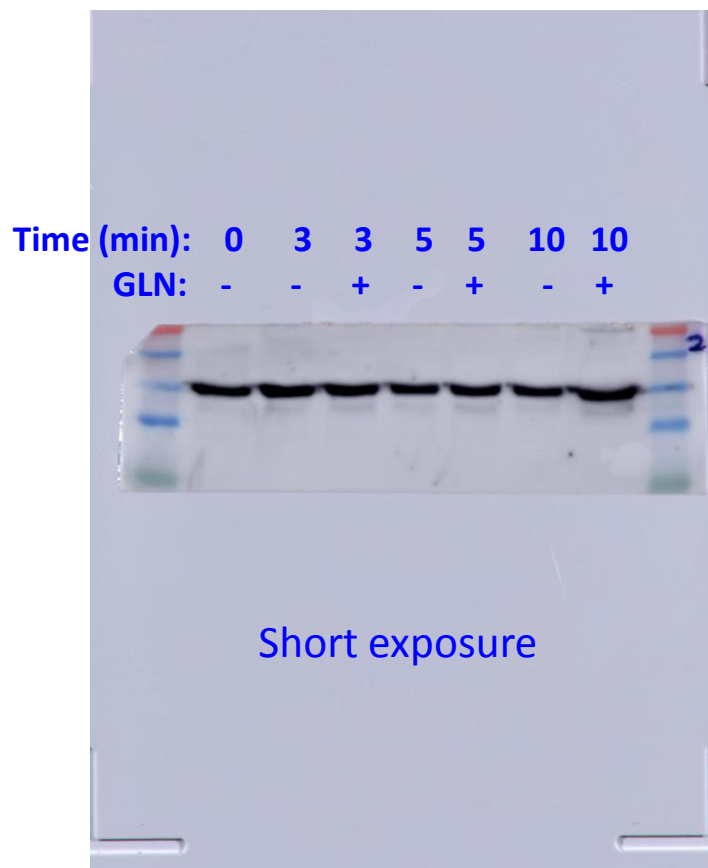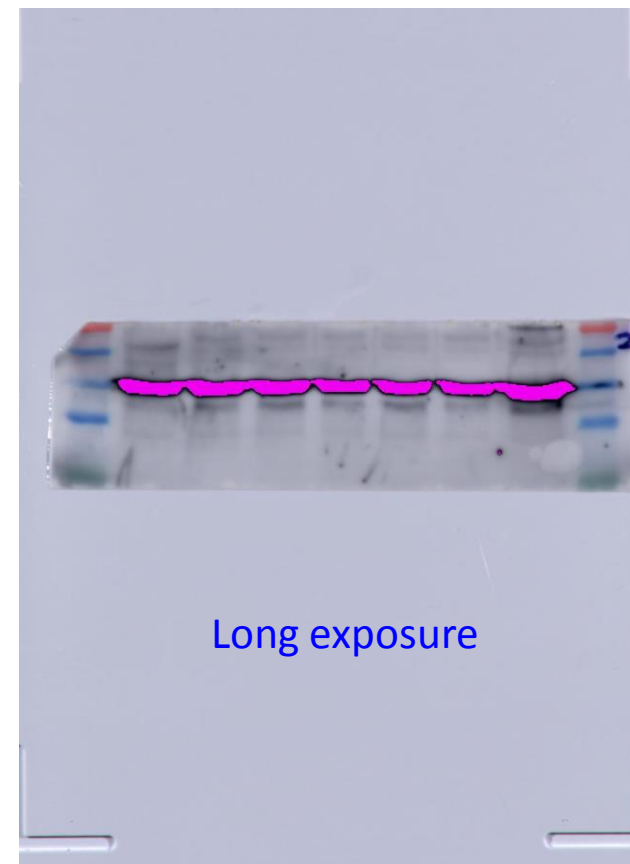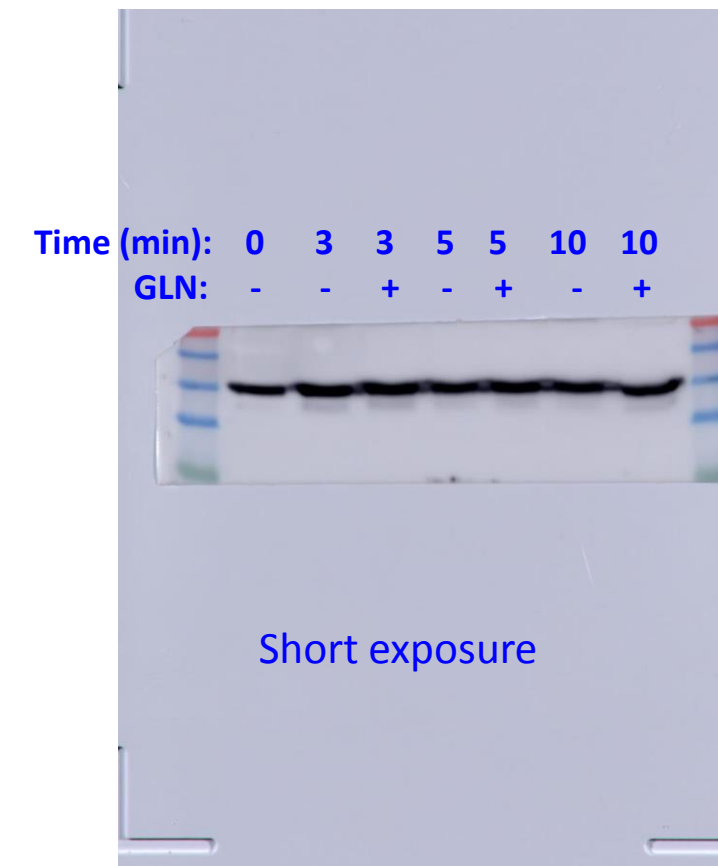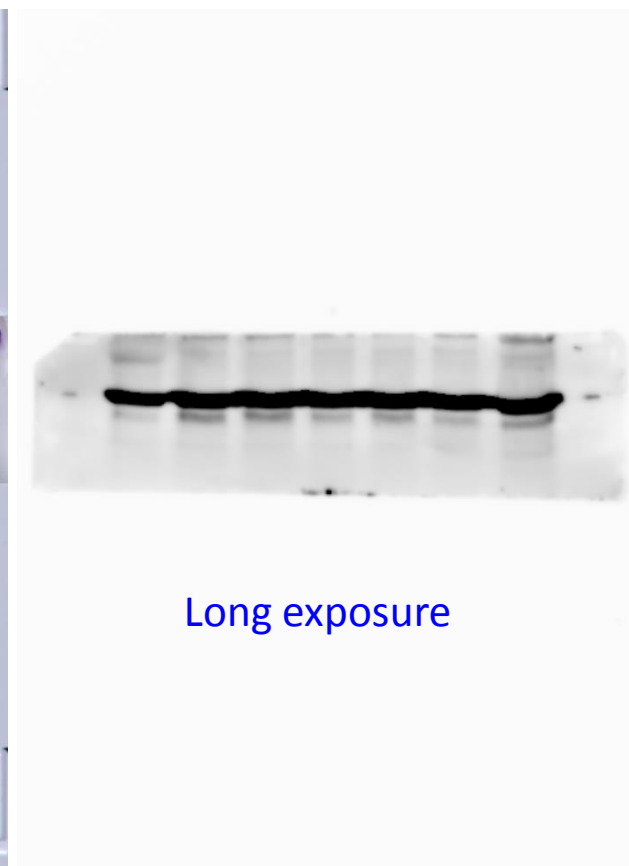

Supplement: s1 [file s1]

# Actin-3

GLN (mg): 0 0 0 0 3 3 3 3 10 10 10 10 30 30 30 30

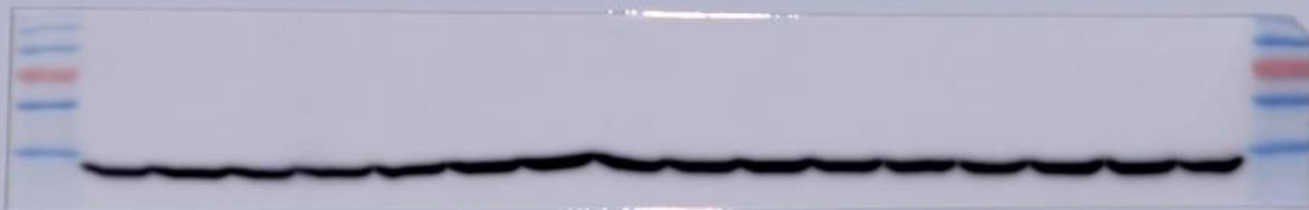

Supplement: s1 [file s1]

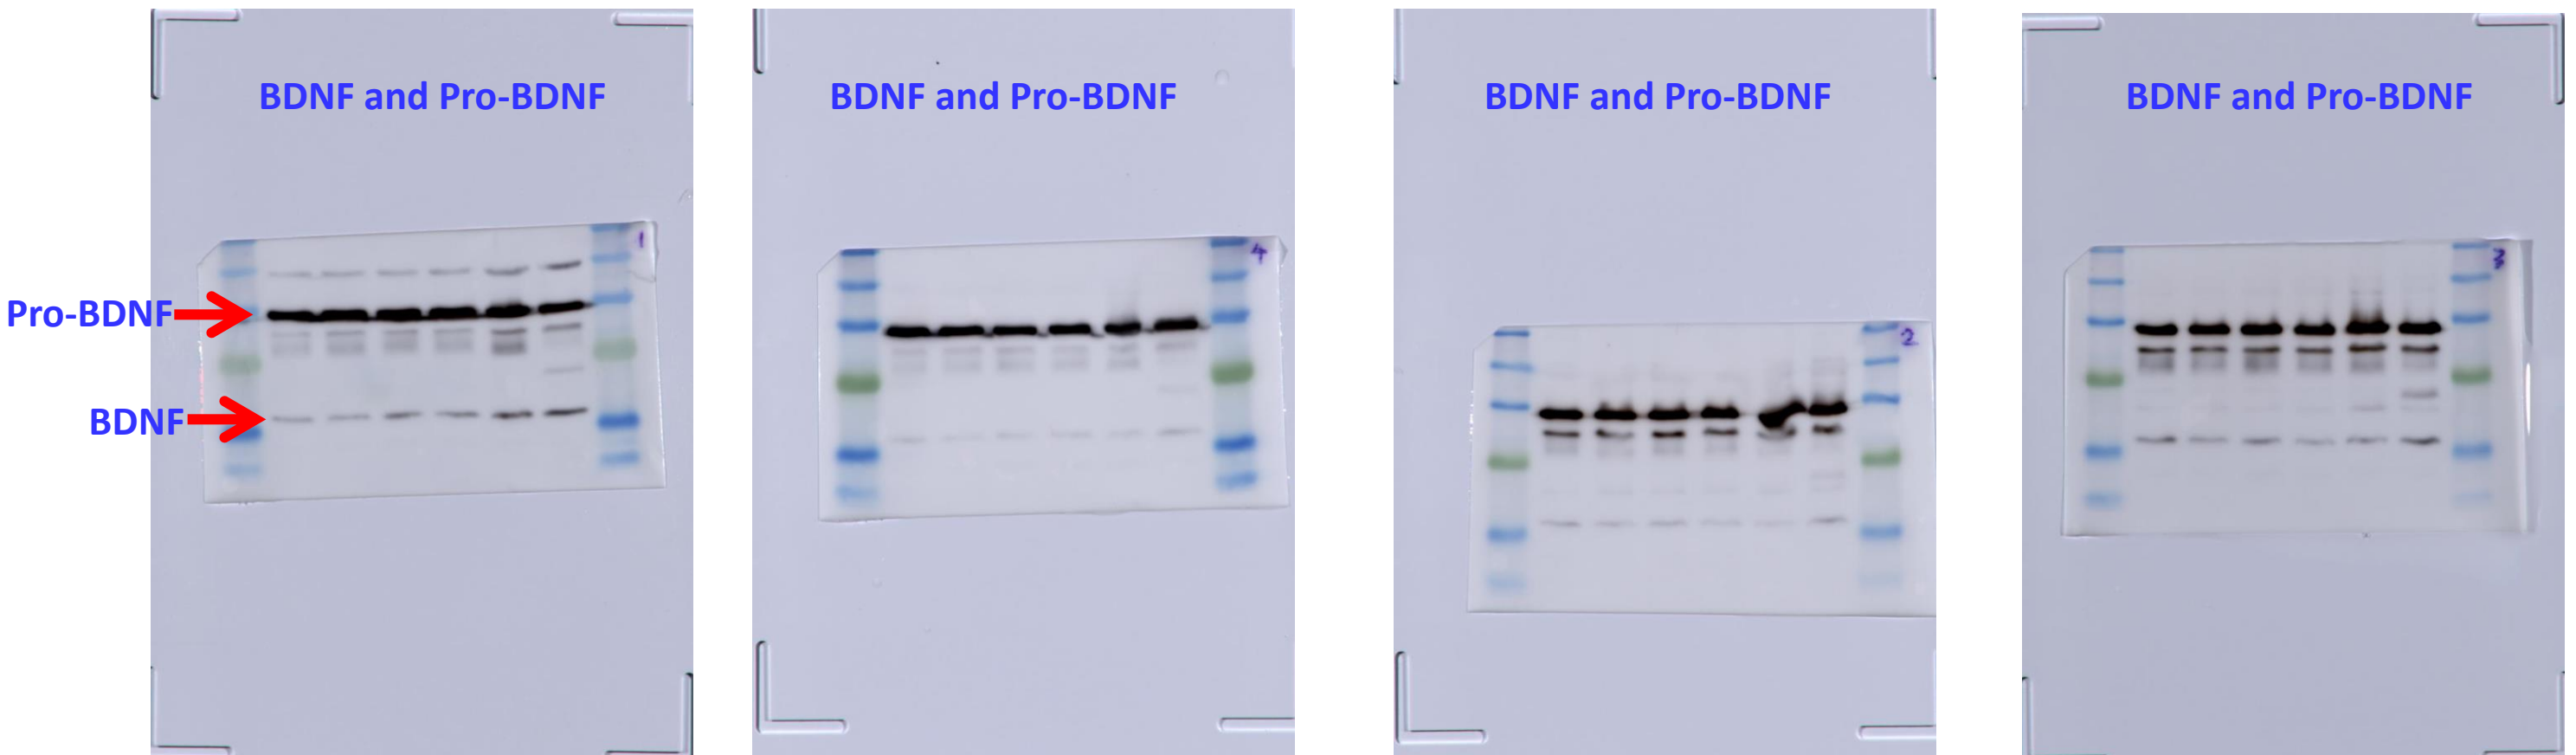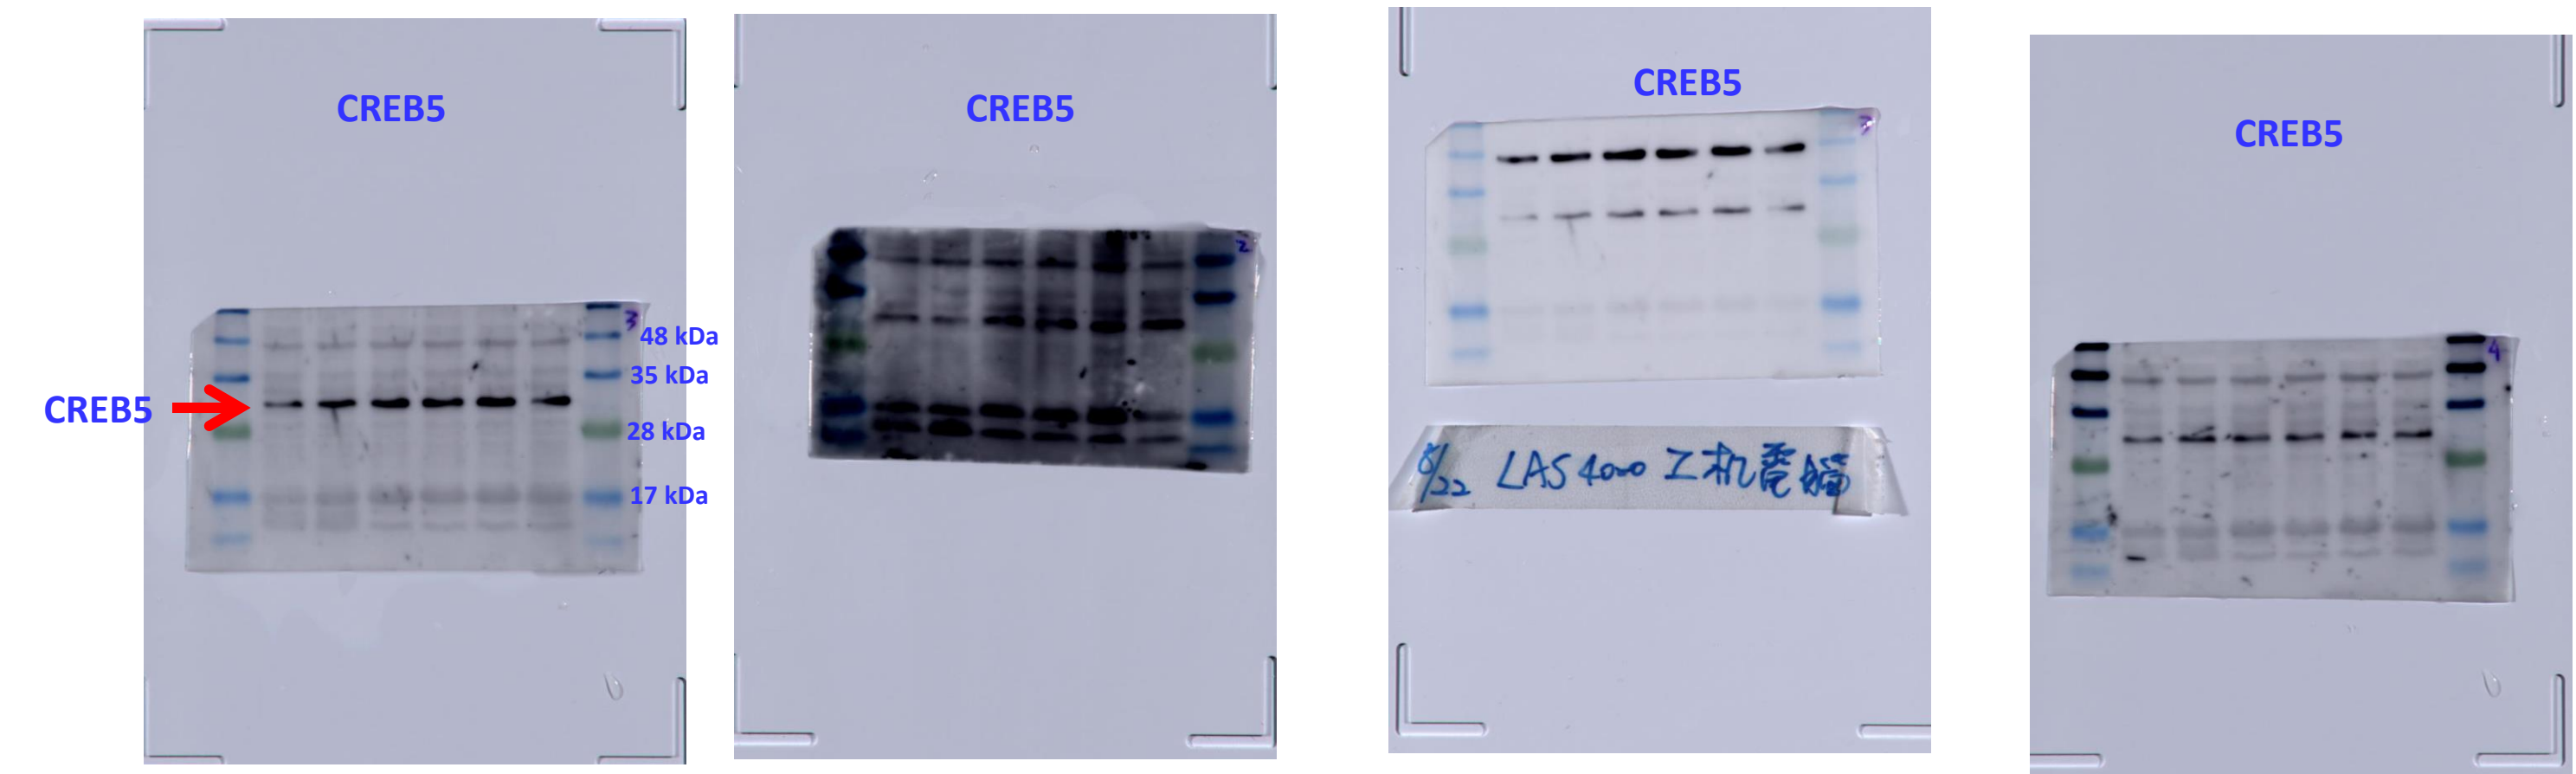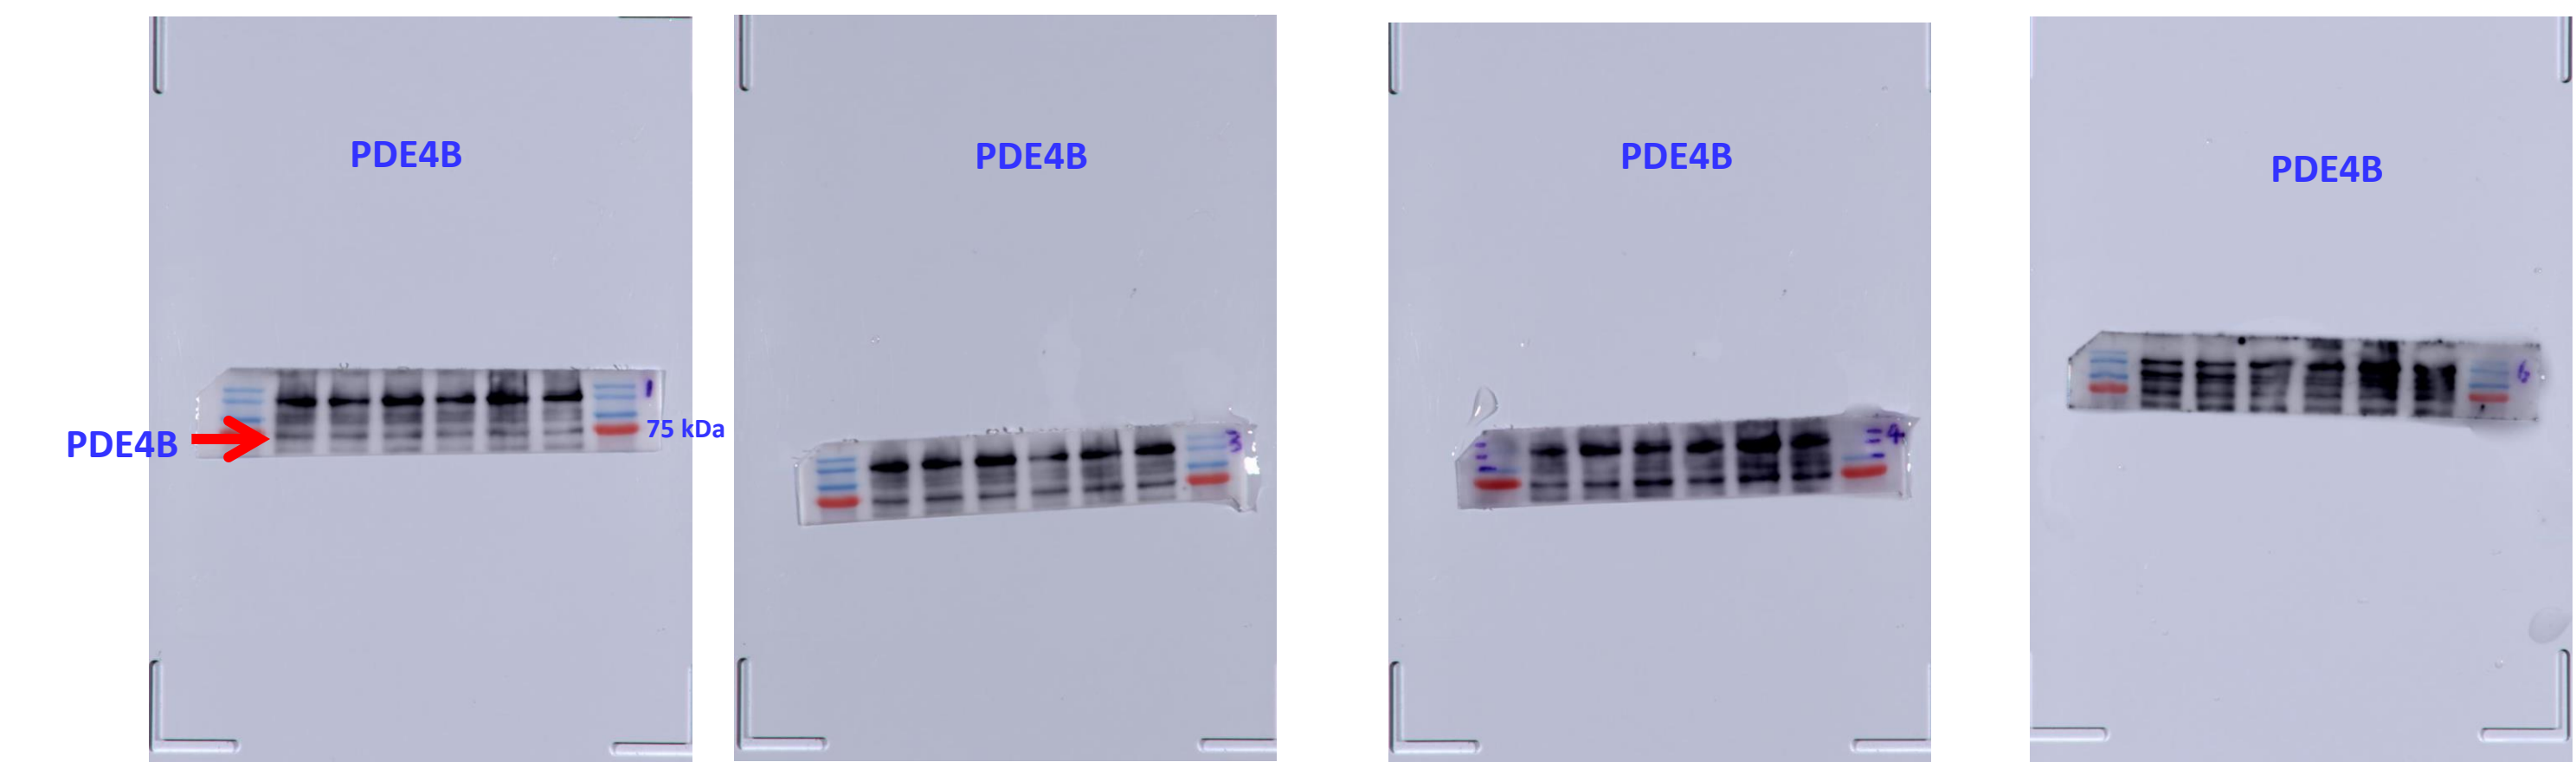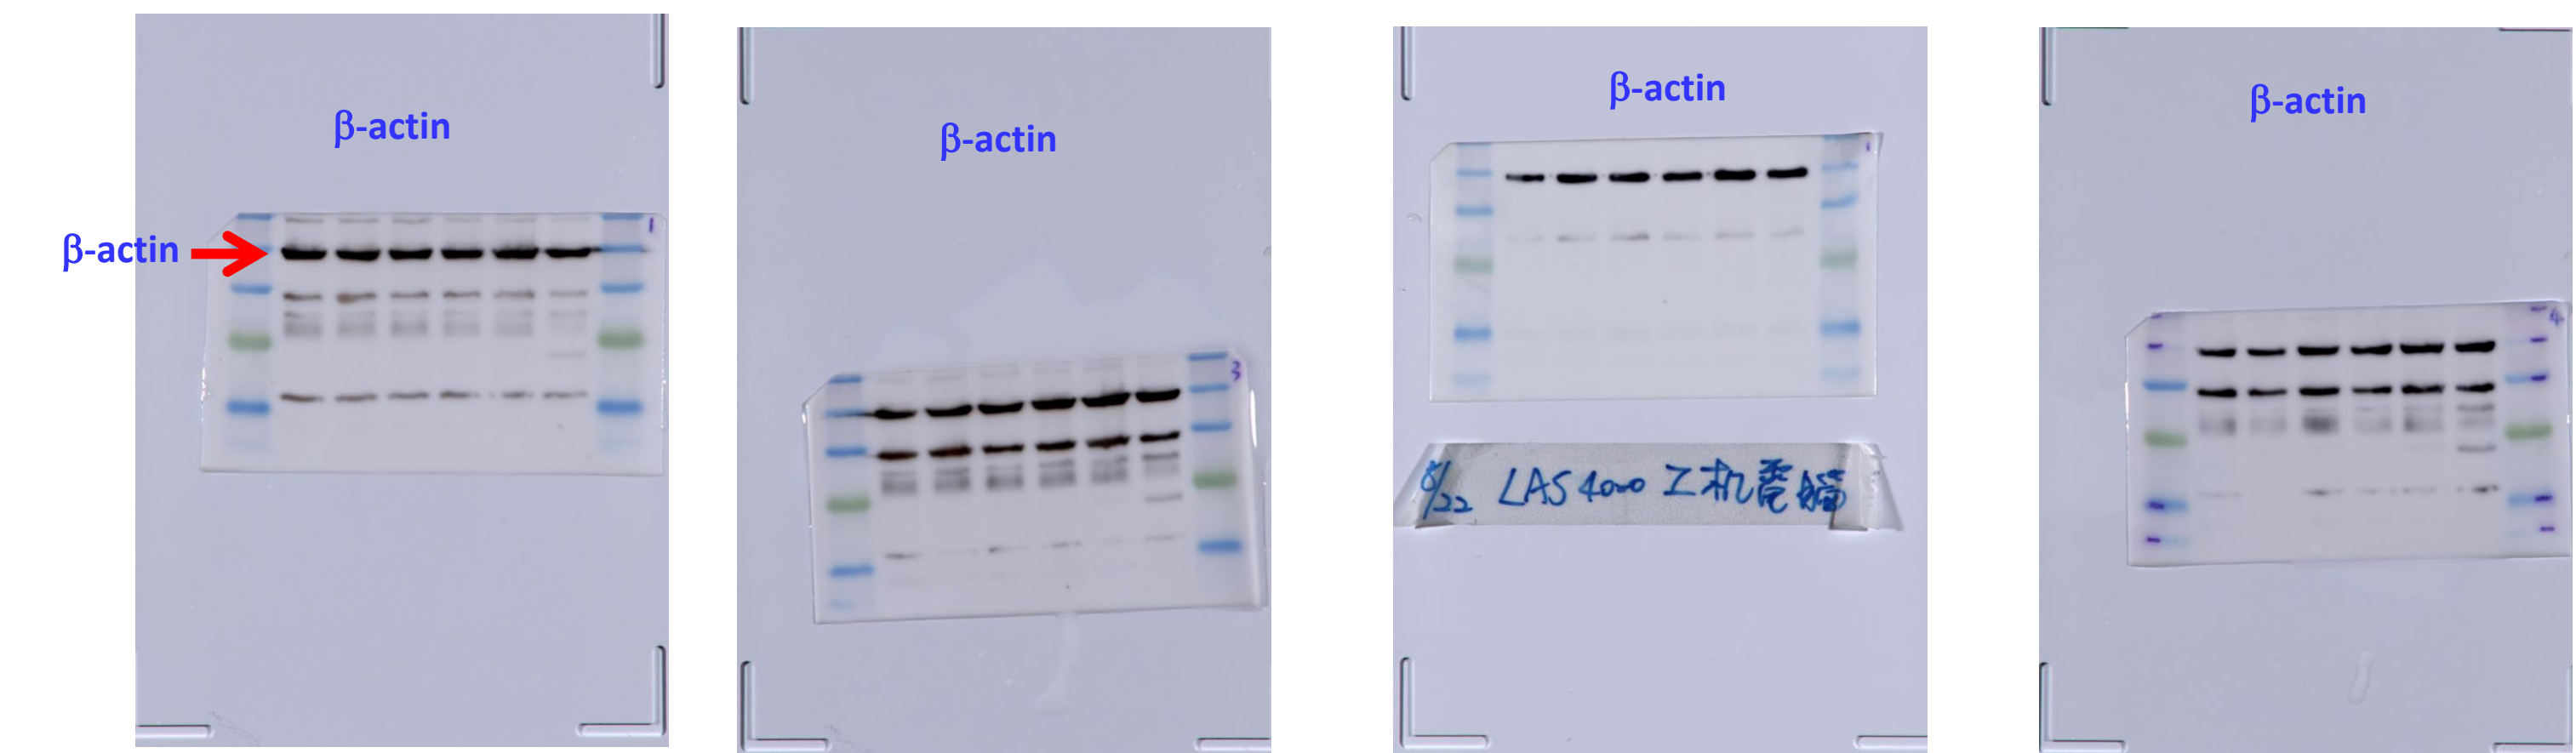

Supplement: s1 [file s1]

## Actin -3

GLN (mg): 0 0 0 0 3 3 3 3 10 10 10 10 30 30 30 30

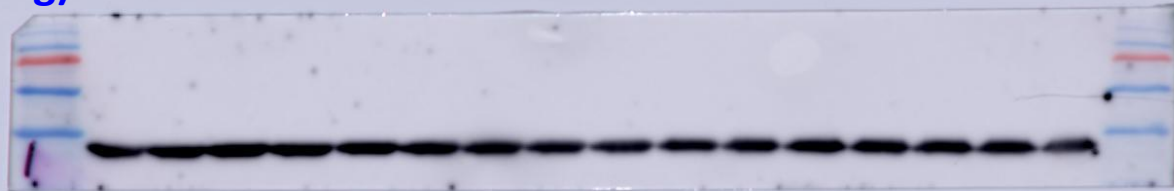

Supplement: s1 [file s1]

## Mice body weight

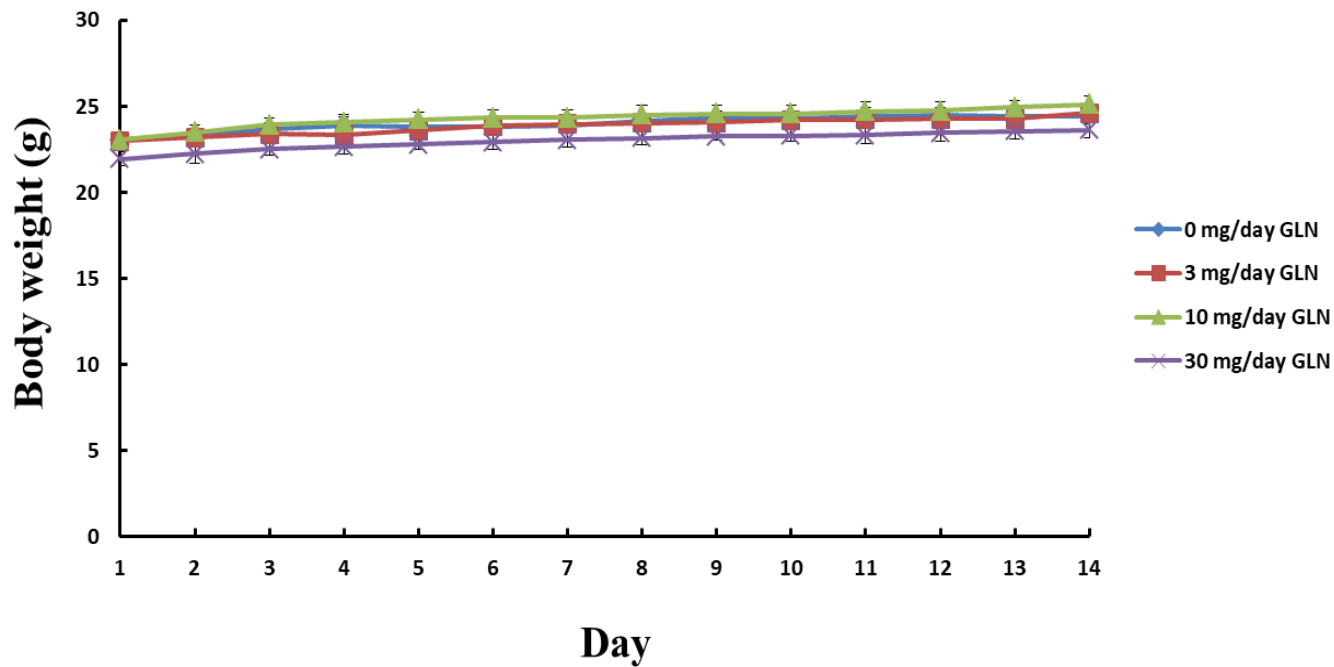

Supplement: s1 [file s1]

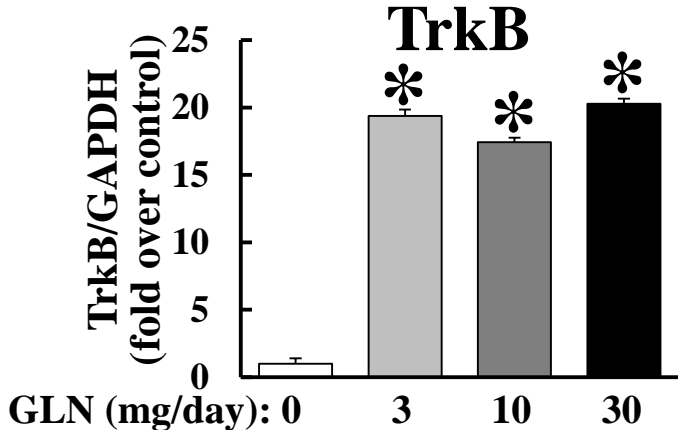

Supplement: s1 [file s1]

Actin

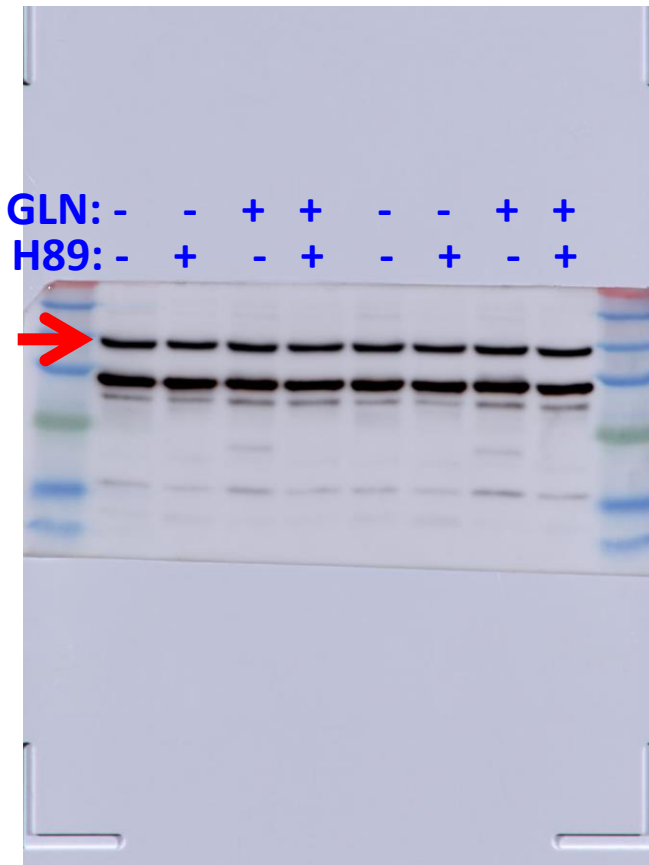

Actin

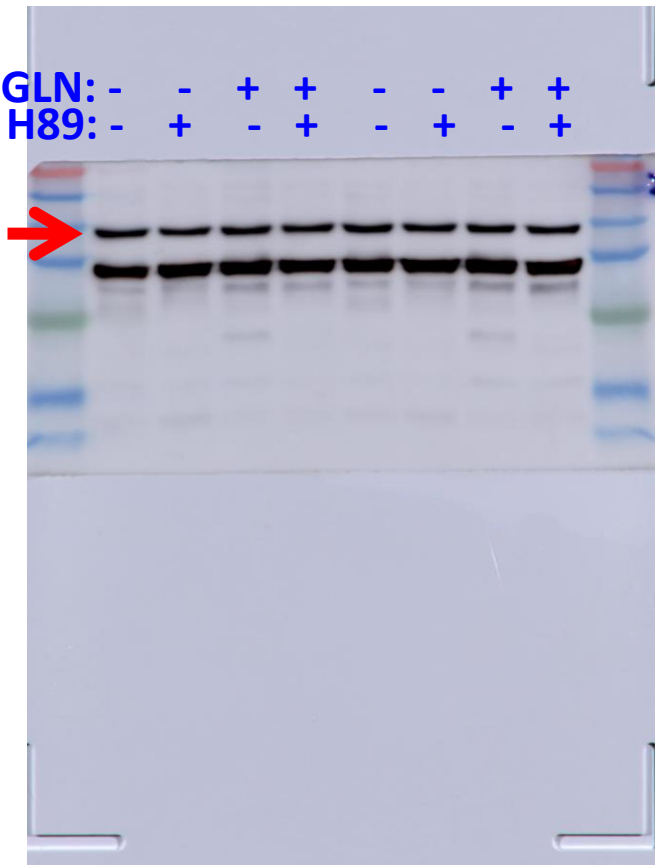

BDNF

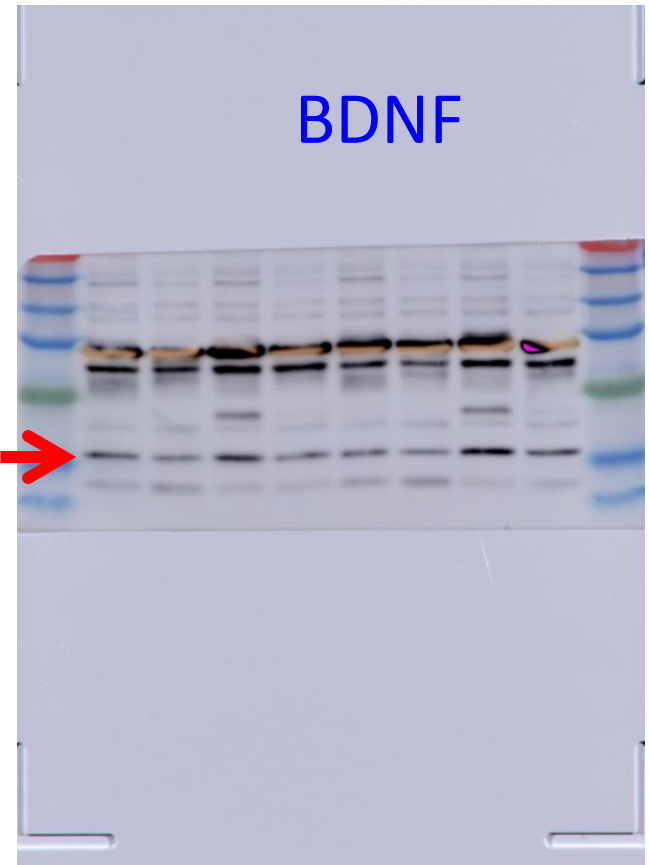

BDNF

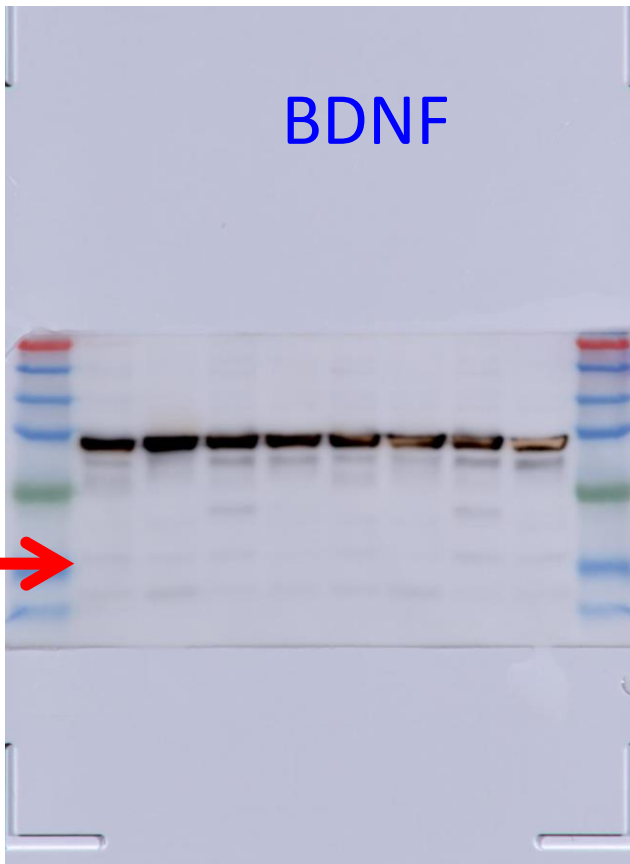

Pro-BDNF

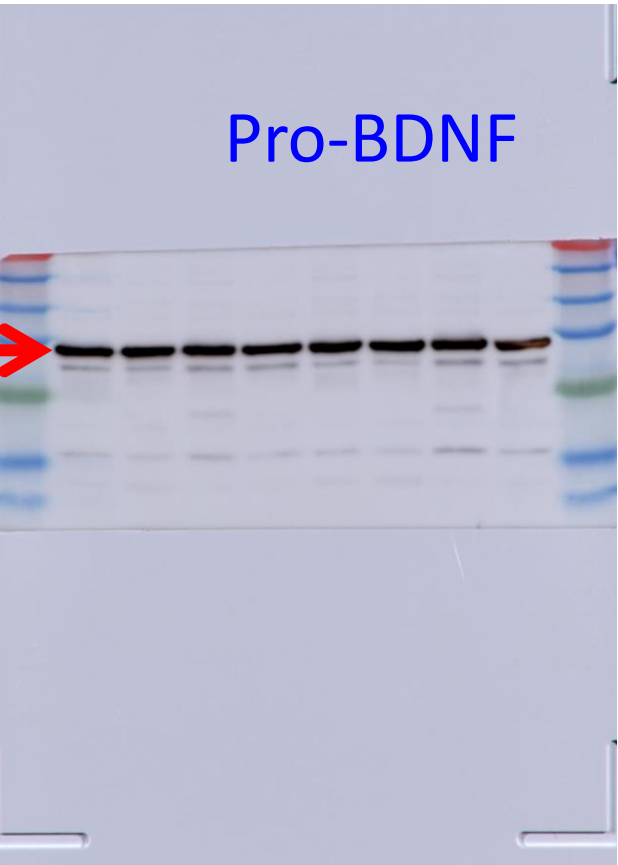

Pro-BDNF

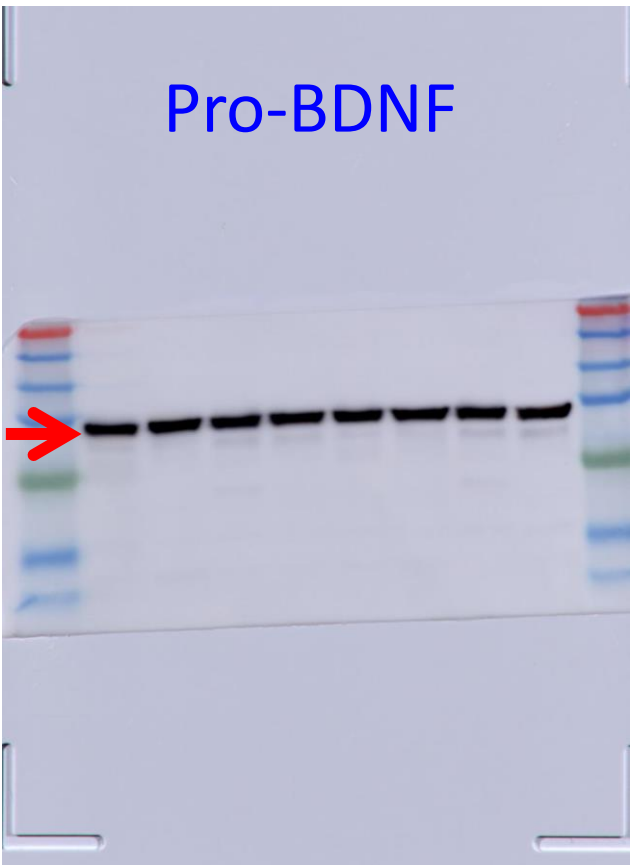

Supplement: s1 [file s1]

# Actin-3

GLN (mg): 0 0 0 0 3 3 3 3 10 10 10 10 30 30 30 30

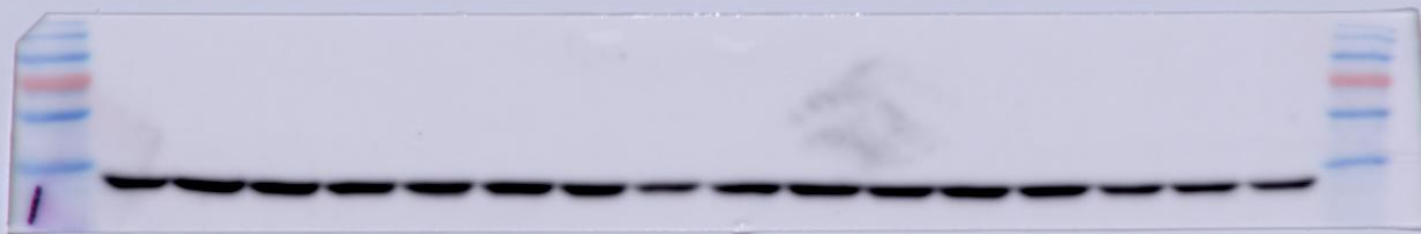

Supplement: s1 [file s1]
